# Supplementary material
Source: publisher figshare collection journal article supplement (https://acs.figshare.com/ndownloader/files/3875128)
Supplement: Supplementary file 1 [file 3875128]

# Polymorph Selection and Structure Evolution of $\text{CaCO}_3$ Mesocrystals under Control of Poly(sodium 4-styrenesulfonate): Synergetic Effect of Temperature and Mixed Solvent

Lei Liu, Jun Jiang and Shu-Hong Yu\*

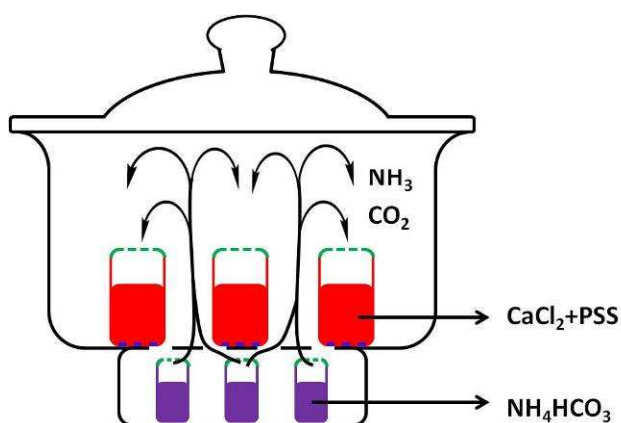

**Figure S1.** Schematic presentation of the gas-liquid diffusion method used for  $\text{CaCO}_3$  crystallization in the present case. Red: solution of  $\text{CaCl}_2$  and PSS; Purple: crushed  $\text{NH}_4\text{HCO}_3$ ; Green: parafilm; Blue: glass slice. The sizes of all glass vessels are just schematic rather than the real ones.

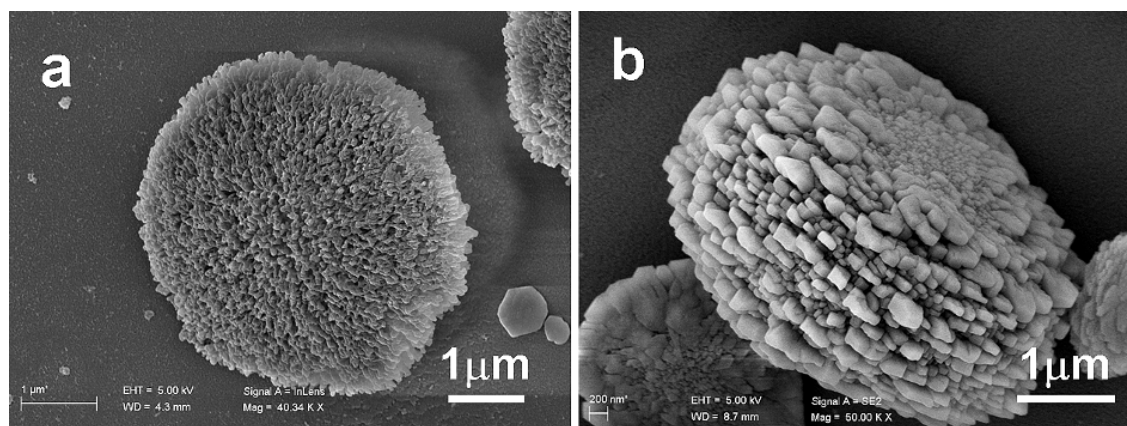

**Figure S2.** SEM images of vaterite mesocrystals obtained after 24h mineralization at  $10 \pm 2$  °C with different volume ratio of water/ethanol. (a)  $R = 7 : 3$ ; (b)  $R = 3 : 7$ .  $[\text{Ca}^{2+}] = 1.5 \text{ mM}$ ,  $[\text{PSS}] = 0.5 \text{ g} \cdot \text{L}^{-1}$ .

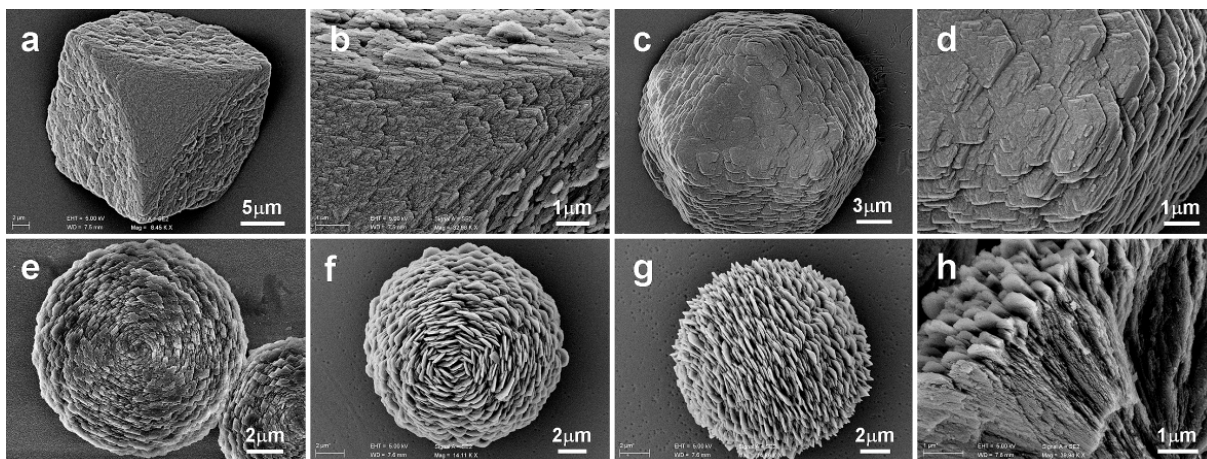

**Figure S3.** SEM images of calcite mesocrystals obtained after 24 h mineralization at  $40 \pm 2$  °C with different volume ratio of water/ethanol. (a,b) R = 10 : 0; (c,d) R = 8 : 2; (e) R = 6 : 4; (f-h) R = 5 : 5.  $[\text{Ca}^{2+}] = 1.5$  mM,  $[\text{PSS}] = 0.5$  g·L<sup>-1</sup>.

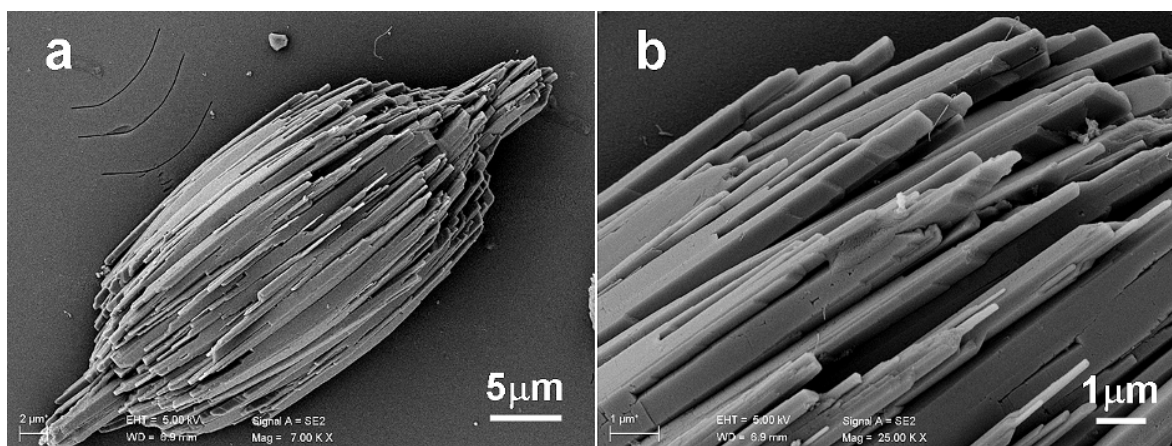

**Figure S4.** SEM images of aragonite rod bundles obtained after 24 h mineralization at  $40 \pm 2$  °C with R = 6:4.  $[\text{Ca}^{2+}] = 1.5$  mM,  $[\text{PSS}] = 0.5$  g·L<sup>-1</sup>.

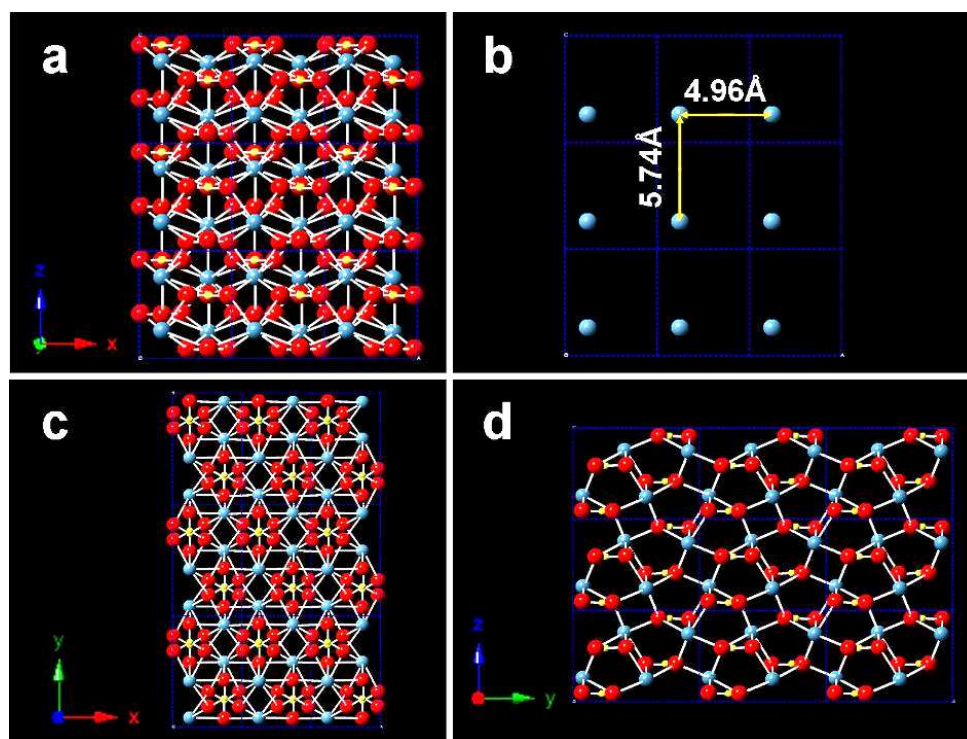

**Figure S5.** Crystal structure of aragonite ( $3 \times 3 \times 3$ ) viewed from different directions. (a,b) along  $[010]$  direction; (c) along  $[001]$  direction; (d) along  $[100]$  direction.
